# Supplementary material for: The effects of Au species and surfactant on the catalytic reduction of 4-nitrophenol by Au@SiO2
Source: Royal Society of Chemistry journal article supplement (doi:10.1039/c4ta04524f), 2014-01-01
Supplement: c4ta04524f1.pdf [file c4ta04524f1.pdf]

## **Supporting Information**

### **The Effects of Au Species and Surfactant of Au@SiO<sub>2</sub> on Catalytic Reduction of 4-Nitrophenol**

Zhijia Wang, Huifen Fu, Dongmei Han, Fubo Gu\*

State Key Laboratory of Chemical Resource Engineering, Beijing University of  
Chemical Technology, Beijing 100029, China

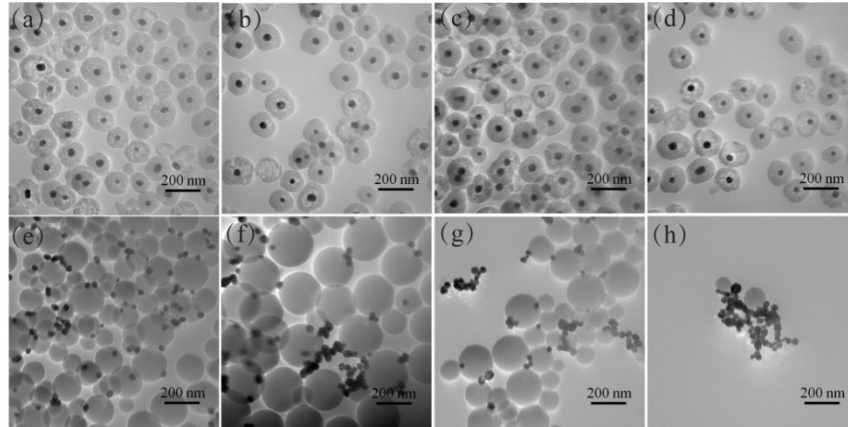

Fig. S1 TEM images of Au@pSiO<sub>2</sub> and Au/SiO<sub>2</sub> annealed at different temperature (a, e) without annealing, (b, f) 350 °C, (c, g) 500 °C, and (d, h) 700 °C.

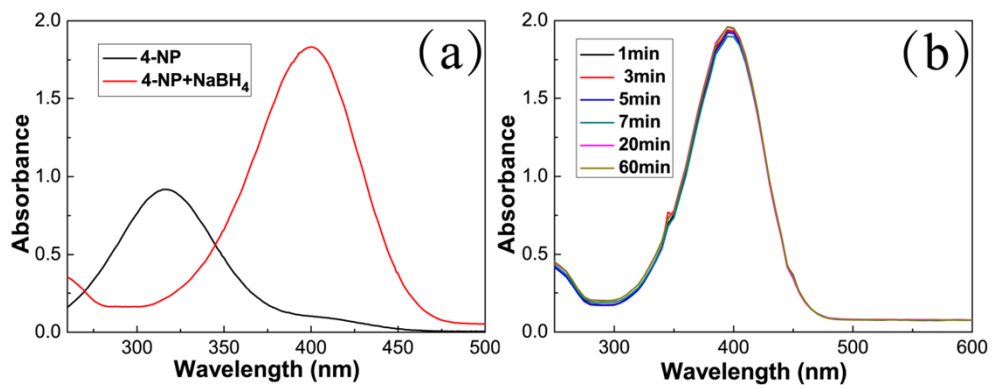

Fig. S2 (a) UV-Vis spectra of 4-NP with and without NaBH<sub>4</sub>, (b) Time-dependent UV-Vis spectra for reduction of 4-NP with NaBH<sub>4</sub>.

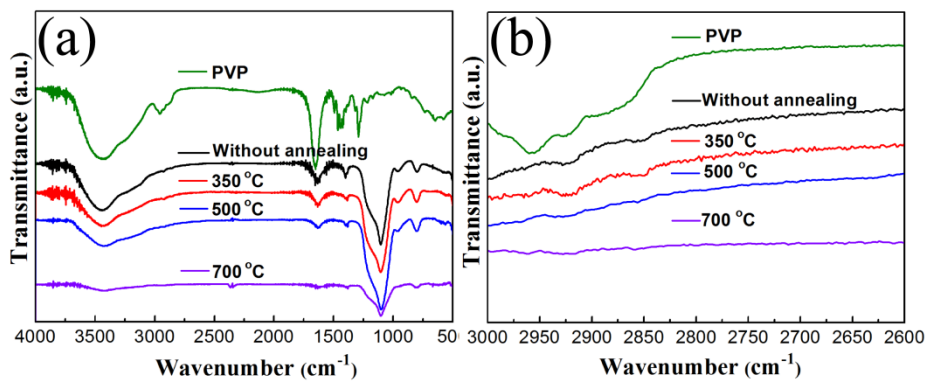

Fig. S3 (a) FTIR spectra of Au@pSiO<sub>2</sub> annealed at different temperature, (b) the magnification figure.

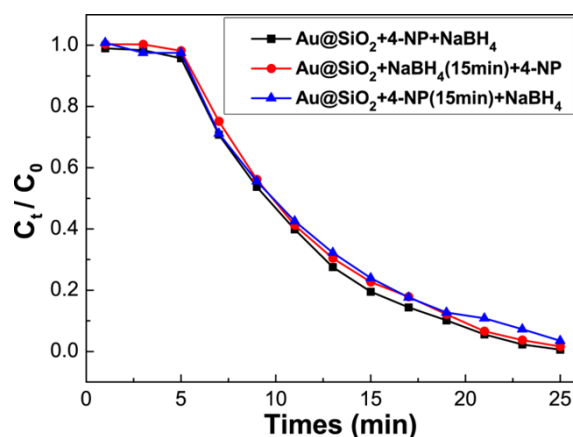

Fig. S4 Time-dependent conversion curves of 4-NP when Au@pSiO<sub>2</sub> was mixed with 4-NP or NaBH<sub>4</sub> for 15 min beforehand.

Table S1 Recent studies on the reduction of 4-NP over Au-containing nanocatalysts

| Catalyst                                        | size of | Initial concentration<br>of 4-NP (10 <sup>-4</sup> mol/L) | k per Au content<br>(10 <sup>-3</sup> s <sup>-1</sup> μmol Au <sup>-1</sup> ) | Ref.      |
|-------------------------------------------------|---------|-----------------------------------------------------------|-------------------------------------------------------------------------------|-----------|
|                                                 | Au (nm) |                                                           |                                                                               |           |
| polyelectrolyte/Au                              | 40      | 0.52                                                      | 0.22                                                                          | 1         |
| graphene/Au                                     | 15      | 0.93                                                      | 26                                                                            | 2         |
| polyelectrolyte/Au                              | 14      | 0.52                                                      | 2.0                                                                           | 1         |
| Au@Air@mSiO <sub>2</sub>                        | 10      | 0.55                                                      | 3.6                                                                           | 3         |
| flower-like Au@Fe <sub>3</sub> O <sub>4</sub>   | 10      | 1.8                                                       | 3.3                                                                           | 4         |
| dumbbell-like Au-Fe <sub>3</sub> O <sub>4</sub> | 5       | 1.8                                                       | 5.4                                                                           | 4         |
| polymer/Au                                      | 4       | 0.61                                                      | 2.3                                                                           | 5         |
| Au@pSiO <sub>2</sub>                            | 30      | 1.0                                                       | 14                                                                            | This work |

Table S2 Comparison of Au 4f XPS data of Au@pSiO<sub>2</sub> annealed at different temperature.

| Catalysts                      | Au <sup>0</sup> |         | Au <sup>n+</sup> |         | Au <sup>n+</sup> /Au <sup>0</sup> |
|--------------------------------|-----------------|---------|------------------|---------|-----------------------------------|
|                                | Peak            | content | Peak             | content |                                   |
| Untreated-Au@pSiO <sub>2</sub> | 83.9, 87.6      | 0.47    | 84.7, 88.4       | 0.53    | 1.14                              |
| 350-Au@pSiO <sub>2</sub>       | 83.7, 87.4      | 0.57    | 84.3, 88.0       | 0.43    | 0.75                              |
| 500-Au@pSiO <sub>2</sub>       | 83.8, 87.5      | 0.64    | 84.5, 88.2       | 0.36    | 0.56                              |
| 700-Au@pSiO <sub>2</sub>       | 83.6, 87.3      | 0.71    | 84.2, 87.9       | 0.29    | 0.41                              |

## References

- 1 B. Ballarin, M. Cassani, D. Tonelli, E. Boanini, S. Albonetti, M. Blosi and M. Gazzano, *J. Phys. Chem. C*, 2010, **114**, 9693.
- 2 J. Li, C. Liu and Y. Liu, *J. Mater. Chem.*, 2012, **22**, 8426.
- 3 H. Wang, J. Wang, H. Zhou, Y. Liu, P. Sun and T. Chen, *Chem. Commun.*, 2011, **47**, 7680.
- 4 F. Lin and R. Doong, *J. Phys. Chem. C*, 2011, **115**, 6591.
- 5 M. Zhang, L. Liu, C. Wu, G. Fu, H. Zhao and B. He, *Polymer*, 2007, **48**, 1989.
- 6 F. Cardenas-Lizana, S. Gomez-Quero, G. J., Y. Ji, B. Davis, L. Kiwi-Minsker and M. Keane, *J. Phys. Chem. C*, 2012, **116**, 11166
- 7 X. Liu, M. Liu, Y. Luo, C. Mou, S. Lin, H.Cheng, J. Chen, J.Lee and Tien-Sung Lin, *J. Am. Chem. Soc.*, **2012**, *134*, 10251
